# Supplementary material for: Long-term drainage reduces CO 2 uptake and increases CO 2 emissionon a Siberian floodplain due to shifts in vegetation community and soilthermal characteristics
Source: Copernicus journal article supplement (doi:10.5194/bg-13-4219-2016), 2016-07-26
Supplement: Supplementary file 1 [file bg-13-4219-2016-supplement.zip]

Archive with 4 entries (4 files):
- bg-13-4219-2016-supplement-title-page.pdf
- suppf02.pdf
- Supplementary Table.docx
- suppf01.pdf
