# Supplementary material for: Long-term drainage reduces CO 2 uptake and increases CO 2 emissionon a Siberian floodplain due to shifts in vegetation community and soilthermal characteristics
Source: Copernicus journal article supplement (doi:10.5194/bg-13-4219-2016), 2016-07-26
Supplement: Supplementary file 1 [file bg-13-4219-2016-supplement.zip › bg-13-4219-2016-supplement-title-page.pdf]

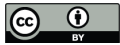

## *Supplement of*

# **Long-term drainage reduces CO<sub>2</sub> uptake and increases CO<sub>2</sub> emission on a Siberian floodplain due to shifts in vegetation community and soil thermal characteristics**

**Min Jung Kwon et al.**

*Correspondence to:* Min Jung Kwon ([mkwon@bgc-jena.mpg.de](mailto:mkwon@bgc-jena.mpg.de))

- [bg-13-4219-2016-supplement-title-page.pdf](#)
- [Supplementary Table.docx](#)
- [suppf01.pdf](#)
- [suppf02.pdf](#)

The copyright of individual parts of the supplement might differ from the CC-BY 3.0 licence.
