# Supplementary figures and images for: Long-term drainage reduces CO 2 uptake and increases CO 2 emissionon a Siberian floodplain due to shifts in vegetation community and soilthermal characteristics
Source: Copernicus journal article supplement (doi:10.5194/bg-13-4219-2016), 2016-07-26

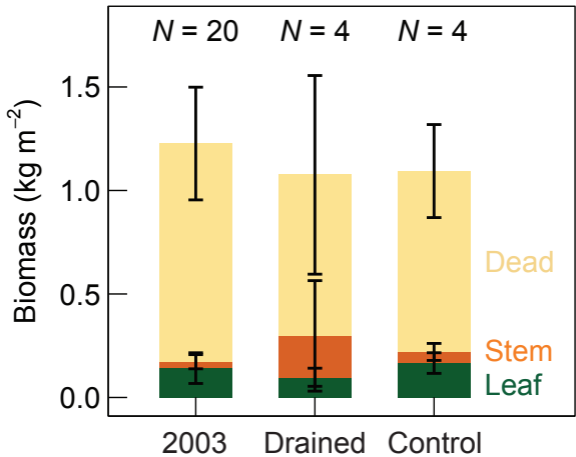

Supplement: Supplementary file 1 [file bg-13-4219-2016-supplement.zip › suppf02.pdf]

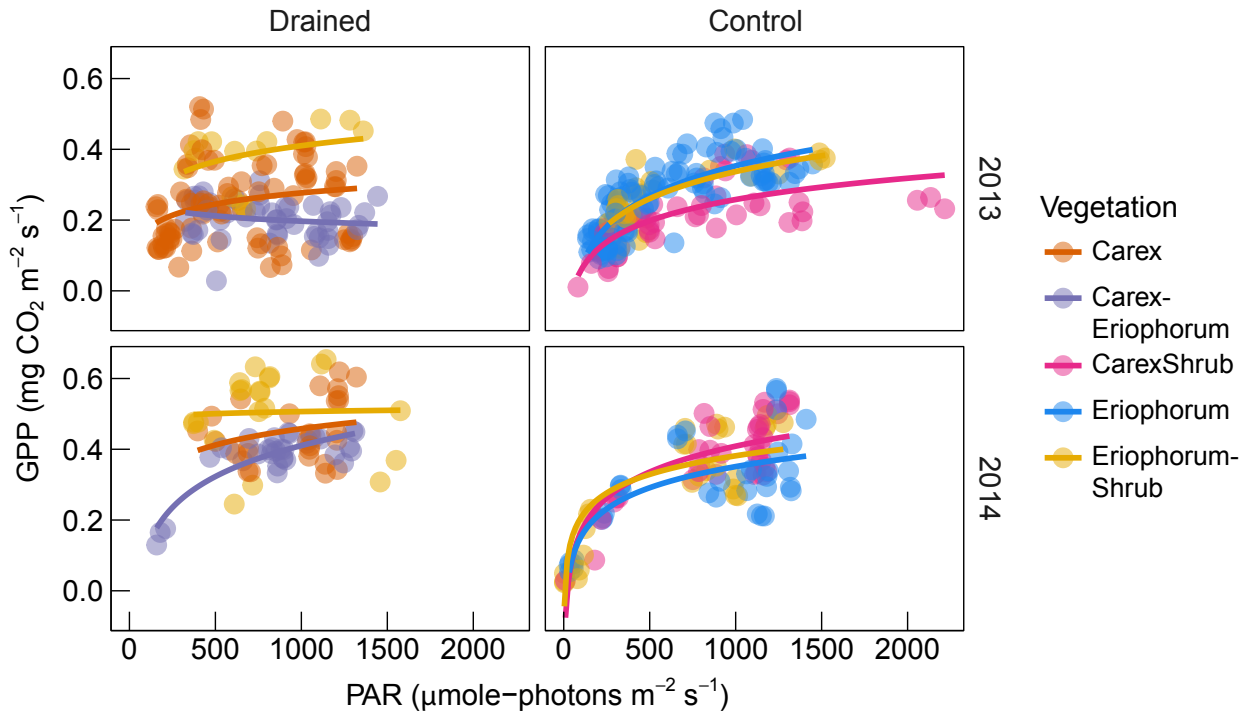

Supplement: Supplementary file 1 [file bg-13-4219-2016-supplement.zip › suppf01.pdf]
